# Supplementary material for: Effects of Factors Influencing Scar Formation on the Scar Microbiome in Patients with Burns
Source: MDPI journal article supplement (doi:10.3390/ijms242115991), 2023-11-06
Supplement: s1 [file s1]

# Supplementary materials

## Effects of Factors Influencing Scar Formation on the Scar Microbiome in Patients with Burns

Yeongyun Jung <sup>1</sup>, Hui Song Cui <sup>1</sup>, Eun Kyung Lee <sup>1</sup>, So Young Joo <sup>2</sup>, Cheong Hoon Seo <sup>2</sup> and Yoon Soo Cho <sup>2,\*</sup>

<sup>1</sup> Burn Institute, Hangang Sacred Heart Hospital, Hallym University College of Medicine, Seoul 07247, Republic of Korea; jyg1076@hallym.ac.kr (Y.J.); bioeast007@naver.com (H.S.C.); eunlee0617@gmail.com (E.K.L.)

<sup>2</sup> Department of Rehabilitation Medicine, Hangang Sacred Heart Hospital, Hallym University College of Medicine, Seoul 07247, Republic of Korea; anyany98@gmail.com (S.Y.J.); chseomd@gmail.com (C.H.S.)

\* Correspondence: yschorm@hallym.ac.kr; Tel.: +82-02-2639-5739; Fax: +82-02-2633-7571

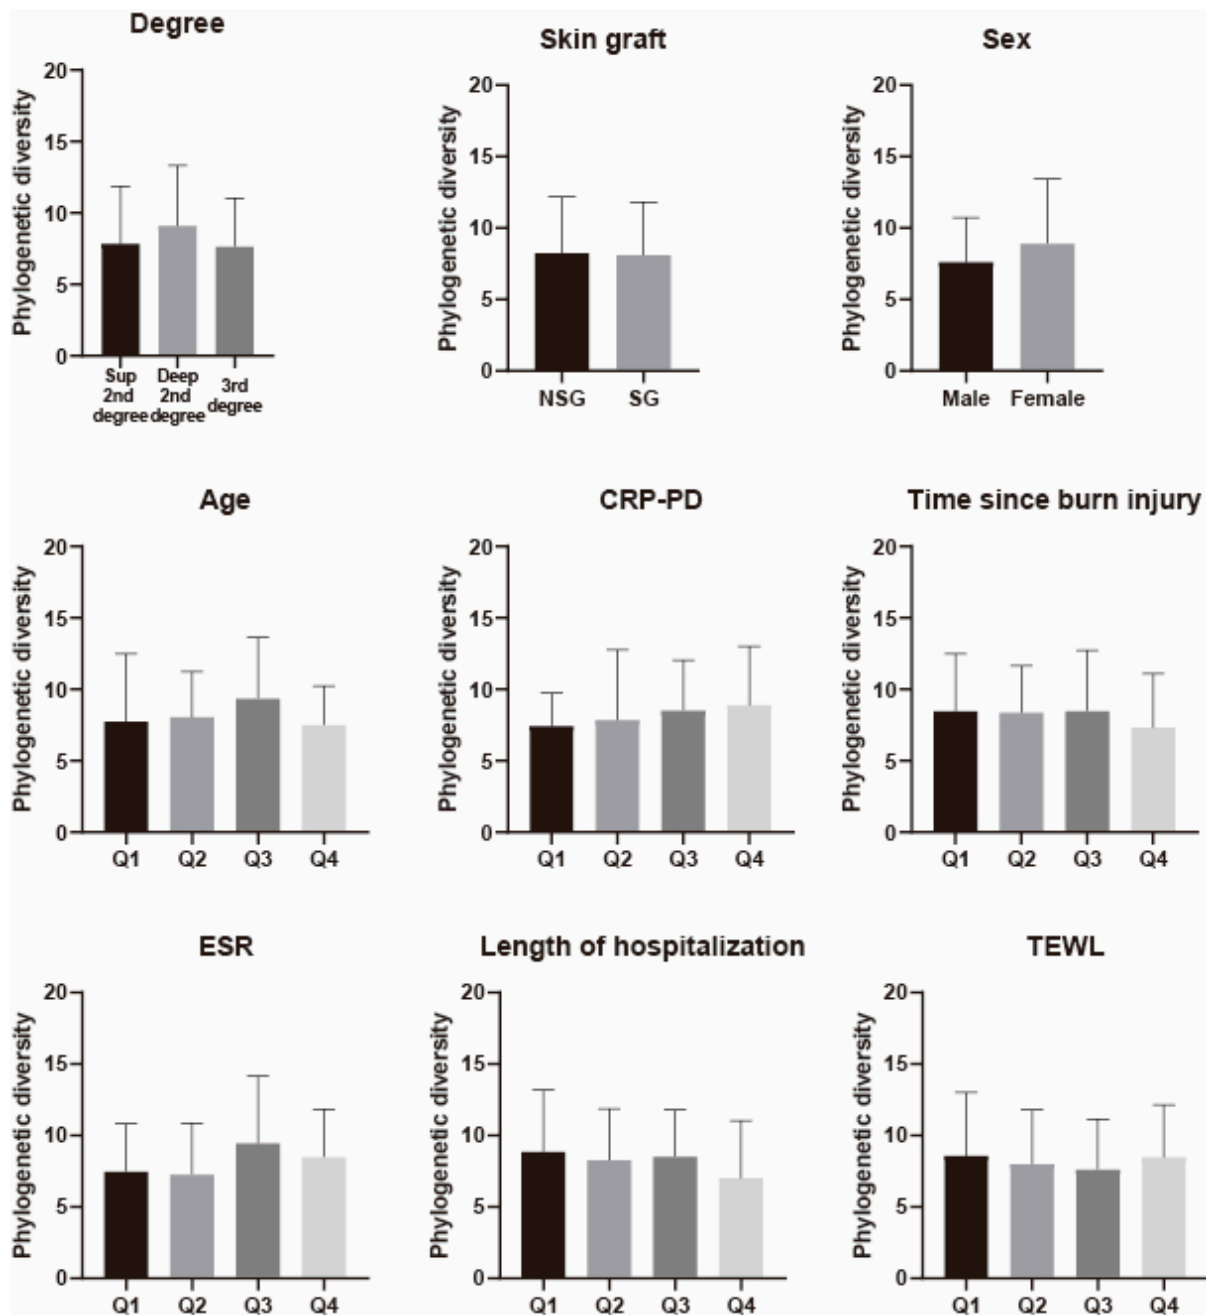

**Supplementary Figure S1.** Comparison of the alpha diversity indexes of skin microbiota according to factors influencing hypertrophic scar formation. Values are expressed as means  $\pm$  standard deviation.

**Supplementary Table S1.** Biomechanical characteristics of participants and burn scars

| <b>Variables</b>                       |                                    | <b>Patients with burns (<i>n</i> = 40)</b> |
|----------------------------------------|------------------------------------|--------------------------------------------|
| <b>Age, years</b>                      |                                    | 46.15 ± 11.68                              |
| <b>Sex</b>                             | Male                               | 23 (57.50%)                                |
|                                        | Female                             | 17 (42.50%)                                |
| <b>Degree</b>                          | Superficial 2 <sup>nd</sup> degree | 9 (22.50%)                                 |
|                                        | Deep 2 <sup>nd</sup> degree        | 13 (32.50%)                                |
|                                        | 3 <sup>rd</sup> degree             | 18 (45.00%)                                |
| <b>Skin graft</b>                      | Yes                                | 20 (50.00%)                                |
|                                        | No                                 | 20 (50.00%)                                |
| <b>TBSA burned, %</b>                  |                                    | 14.00 (6.00, 27.00)                        |
| <b>ESR, mm/H</b>                       |                                    | 11.00 (5.00, 15.25)                        |
| <b>CRP, mg/L</b>                       |                                    | 0.98 (0.51, 2.02)                          |
| <b>Length of hospitalization, days</b> |                                    | 22.50 (15.50, 39.75)                       |
| <b>ICU admission</b>                   | Yes                                | 10 (25.00%)                                |
|                                        | No                                 | 30 (75.00%)                                |
| <b>Time after injury, days</b>         |                                    | 100.48 ± 66.04                             |
| <b>Variables</b>                       |                                    | <b>Scar samples (<i>n</i> = 80)</b>        |
| <b>Scar type</b>                       | Center of scar                     | 40 (50.00%)                                |
|                                        | Scar margin                        | 40 (50.00%)                                |
| <b>Itch NRS</b>                        |                                    | 0.00 (0.00, 4.00)                          |
| <b>Thickness, mm</b>                   |                                    | 0.02 (0.01, 0.15)                          |
| <b>Melanin, AU</b>                     |                                    | 156.74 ± 67.04                             |
| <b>Erythema, AU</b>                    |                                    | 301.31 ± 141.94                            |
| <b>TEWL, g/m<sup>2</sup>h</b>          |                                    | 11.77 ± 4.05                               |
| <b>Skin hydration, AU</b>              |                                    | 45.97 ± 14.94                              |

Data are presented as mean ± standard deviation or median (25<sup>th</sup> percentile, 75<sup>th</sup> percentile) for continuous variables or numbers (%) for categorical variables. Abbreviations: TBSA, total body surface area; ESR, erythrocyte sedimentation rate; CRP, C-reactive protein; ICU, Intensive care unit; NRS, numerical rating scale; TEWL, transepidermal water loss; AU, arbitrary unit.

**Supplementary Table S2.** Biomechanical characteristics of participants and scars according to the subgroups

| Variables                       |                                    | Group (patients with burns) |                    |             |                 |                 |             |                 |                 |             |
|---------------------------------|------------------------------------|-----------------------------|--------------------|-------------|-----------------|-----------------|-------------|-----------------|-----------------|-------------|
|                                 |                                    | Sex                         |                    | P-<br>value | Skin graft      |                 | P-<br>value | ICU admission   |                 | P-<br>value |
|                                 |                                    | Male<br>(n = 23)            | Female<br>(n = 17) |             | Yes<br>(n = 20) | No<br>(n = 20)  |             | Yes<br>(n = 10) | No<br>(n = 30)  |             |
| Age, years                      |                                    | 44.96 ± 11.94               | 47.76 ± 11.85      | 0.468       | 47.30 ± 11.13   | 45.00 ± 12.67   | 0.597       | 47.80 ± 10.50   | 45.60 ± 12.36   | 0.650       |
| Sex                             | Male                               | 23 (100.00%)                | 0 (0.00%)          | <0.001      | 11 (55.00%)     | 12 (60.00%)     | 0.749       | 8 (80.00%)      | 15 (50.00%)     | 0.097       |
|                                 | Female                             | 0 (0.00%)                   | 23 (100.00%)       |             | 9 (45.00%)      | 8 (40.00%)      |             | 2 (20.00%)      | 15 (50.00%)     |             |
| Degree                          | Superficial 2 <sup>nd</sup> degree | 5 (21.74%)                  | 4 (23.53%)         | 0.938       | 0 (0.00%)       | 9 (45.00%)      | <0.001      | 2 (20.00%)      | 7 (23.33%)      | 0.138       |
|                                 | Deep 2 <sup>nd</sup> degree        | 8 (34.78%)                  | 5 (29.41%)         |             | 2 (10.00%)      | 11 (55.00%)     |             | 1 (10.00%)      | 12 (40.00%)     |             |
|                                 | 3 <sup>rd</sup> degree             | 10 (43.48%)                 | 8 (47.06%)         |             | 18 (90.00%)     | 0 (0.00%)       |             | 7 (70.00%)      | 11 (36.67%)     |             |
| Skin graft                      | Yes                                | 11 (47.83%)                 | 9 (52.94%)         | 0.102       | 20 (100.00%)    | 0 (0.00%)       | <0.001      | 7 (70.00%)      | 13 (43.33%)     | 0.144       |
|                                 | No                                 | 12 (52.17%)                 | 8 (47.06%)         |             | 0 (0.00%)       | 20 (100.00%)    |             | 3 (30.00%)      | 17 (56.67%)     |             |
| TBSA burned, %                  |                                    | 20.48 ± 15.87               | 16.06 ± 14.35      | 0.305       | 25.05 ± 17.44   | 12.15 ± 9.12    | 0.020       | 36.30 ± 15.80   | 12.70 ± 9.47    | <0.001      |
| ESR, mm/H                       |                                    | 10.70 ± 9.17                | 12.65 ± 6.33       | 0.170       | 13.20 ± 7.92    | 9.85 ± 8.04     | 0.125       | 13.30 ± 9.06    | 10.93 ± 7.77    | 0.472       |
| CRP, mg/L                       |                                    | 2.37 ± 3.32                 | 2.03 ± 2.87        | 0.299       | 3.07 ± 3.75     | 1.38 ± 2.06     | 0.147       | 2.27 ± 2.40     | 2.21 ± 3.35     | 0.170       |
| Length of hospitalization, days |                                    | 26.65 ± 13.82               | 27.18 ± 25.49      | 0.537       | 36.65 ± 20.28   | 17.10 ± 12.50   | 0.002       | 40.40 ± 16.01   | 22.37 ± 18.44   | 0.007       |
| ICU admission                   | Yes                                | 8 (34.78%)                  | 2 (11.76%)         | 2.762       | 7 (35.00%)      | 3 (15.00%)      | 0.144       | 10 (100.00%)    | 0 (0.00%)       | <0.001      |
|                                 | No                                 | 15 (65.22%)                 | 15 (88.24%)        |             | 13 (65.00%)     | 17 (85.00%)     |             | 0 (0.00%)       | 30 (100.00%)    |             |
| Time after injury, days         |                                    | 96.91 ± 67.28               | 105.30 ± 68.09     | 0.593       | 130.40 ± 74.01  | 70.60 ± 42.71   | 0.003       | 153.40 ± 76.87  | 82.83 ± 53.79   | 0.005       |
| Variables                       |                                    | Group (burn scars)          |                    |             |                 |                 |             |                 |                 |             |
|                                 |                                    | Sex                         |                    | P-<br>value | Skin graft      |                 | P-<br>value | ICU admission   |                 | P-<br>value |
|                                 |                                    | Male (n = 46)               | Female (n = 34)    |             | Yes (n = 40)    | No (n = 40)     |             | Yes (n = 20)    | No (n = 60)     |             |
| Scar type                       | Center of scar                     | 23 (50.00%)                 | 17 (50.00%)        | >0.999      | 20 (50.00%)     | 20 (50.00%)     | >0.999      | 10 (50.00%)     | 30 (50.00%)     | >0.999      |
|                                 | Scar margin                        | 23 (50.00%)                 | 17 (50.00%)        |             | 20 (50.00%)     | 20 (50.00%)     |             | 10 (50.00%)     | 30 (50.00%)     |             |
| Itch NRS                        |                                    | 2.00 ± 2.58                 | 2.61 ± 3.35        | 0.541       | 2.88 ± 3.35     | 1.65 ± 2.33     | 0.155       | 2.55 ± 3.60     | 2.16 ± 2.66     | 0.984       |
| Thickness, mm                   |                                    | 0.10 ± 0.16                 | 0.12 ± 0.18        | 0.787       | 0.17 ± 0.20     | 0.05 ± 0.10     | 0.039       | 0.15 ± 0.21     | 0.10 ± 0.15     | 0.486       |
| Melanin, AU                     |                                    | 161.30 ± 61.44              | 150.50 ± 75.35     | 0.125       | 152.40 ± 62.28  | 161.10 ± 72.81  | 0.802       | 149.40 ± 68.90  | 159.50 ± 67.30  | 0.754       |
| Erythema, AU                    |                                    | 313.90 ± 136.60             | 284.30 ± 151.30    | 0.238       | 313.10 ± 145.40 | 289.50 ± 141.10 | 0.459       | 287.80 ± 140.30 | 306.40 ± 144.60 | 0.628       |
| TEWL, g/m²h                     |                                    | 12.70 ± 3.76                | 10.52 ± 4.20       | 0.003       | 12.41 ± 4.36    | 11.14 ± 3.71    | 0.169       | 11.55 ± 3.69    | 11.86 ± 4.24    | 0.917       |
| Skin hydration, AU              |                                    | 47.28 ± 14.13               | 44.20 ± 16.22      | 0.623       | 45.00 ± 16.13   | 46.95 ± 14.00   | 0.675       | 51.28 ± 15.27   | 43.96 ± 14.58   | 0.064       |

Data are presented as mean ± standard deviation or median (25<sup>th</sup> percentile, 75<sup>th</sup> percentile) for continuous variables or numbers (%) for categorical variables. Abbreviations: TBSA, total body surface area; ESR, erythrocyte sedimentation rate; CRP, C-reactive protein; ICU, Intensive care unit; NRS, numerical rating scale; TEWL, transepidermal water loss; AU, arbitrary unit.
